# Supplementary material
Source: Springer Nature journal article supplement (https://www.springermedizin.de/resource/supplementary/12936_2010_1250_MOESM4_ESM.pdf/9549326)

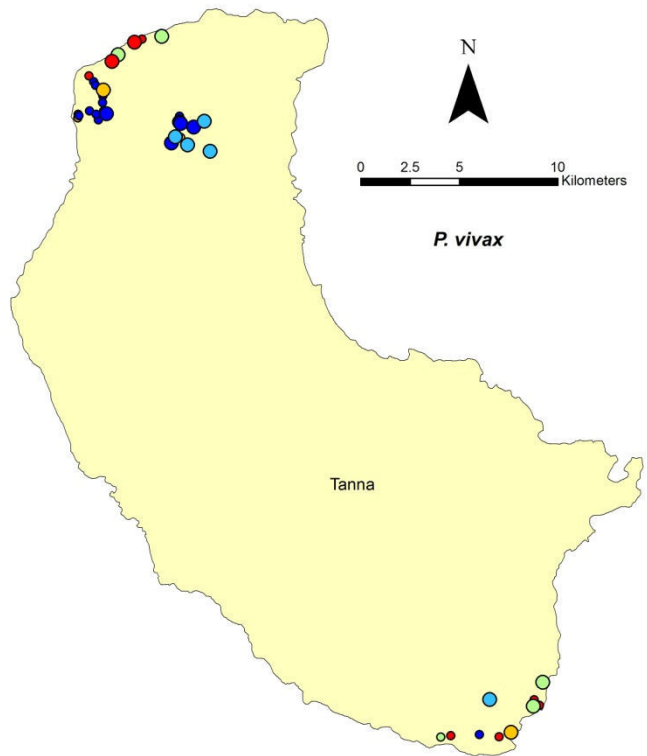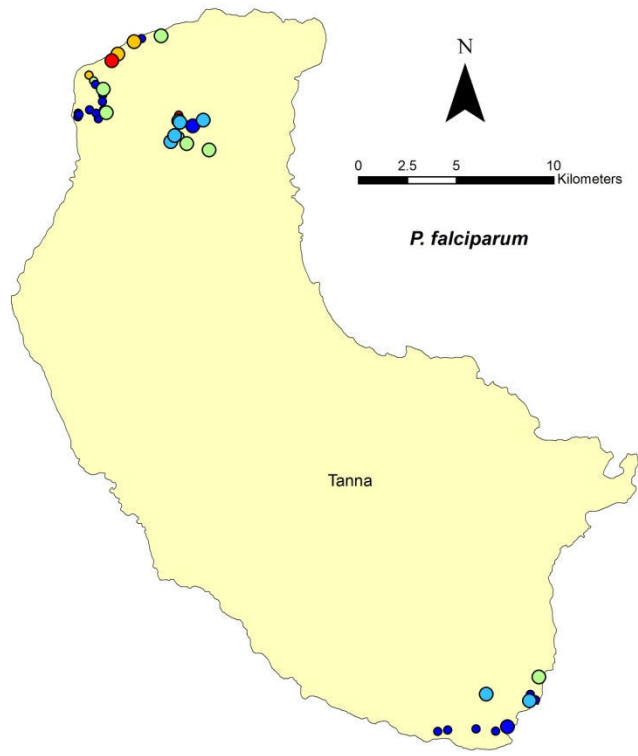

**Sample size <10**

**Seroprevalence 1-10yrs**

- 0%
- >0 - 10%
- >10 - 20%
- >20 - 30%
- >30%

**Sample size >=10**

**Seroprevalence 1-10yrs**

- 0%
- >0 - 10%
- >10 - 20%
- >20 - 30%
- >30%

Supplement: MOESM4 [file 9549326]
